# Supplementary material for: New screening approach for Alzheimer’s disease risk assessment from urine lipid peroxidation compounds
Source: PubMed Central journal article supplement (PMC6775072; doi:10.1038/s41598-019-50837-2), 2019-10-02
Supplement: 41598_2019_50837_MOESM1_ESM.pdf [file 41598_2019_50837_MOESM1_ESM.pdf]

## **New screening approach for Alzheimer's disease risk assessment from urine lipid peroxidation compounds**

Carmen PEÑA-BAUTISTA 1, Claire VIGOR 2, Jean-Marie GALANO 2, Camille OGER 2, Thierry DURAND 2, Inés FERRER 3, Ana CUEVAS 3, Rogelio LÓPEZ-CUEVAS 3, Miguel BAQUERO 3, Marina LÓPEZ-NOGUEROLES 4, Máximo VENTO 1, David HERVÁS-MARÍN 5, Ana GARCÍA-BLANCO 1,\* , Consuelo CHÁFER-PERICÁS1,\*

1Neonatal Research Unit, Health Research Institute La Fe, Valencia, Spain

2Institut des Biomolécules Max Mousseron, IBMM, University of Montpellier, CNRS ENSCM, Montpellier, France

3Neurology Unit, University and Polytechnic Hospital La Fe, Valencia, Spain

4Analytical Unit Platform, Health Research Institute La Fe, Valencia, Spain

5Biostatistical Unit, Health Research Institute La Fe, Valencia, Spain

Corresponding author\*

Consuelo Cháfer-Pericás, PhD

Health Research Institute La Fe

Avda de Fernando Abril Martorell, 106; 46026 Valencia (Spain)

Phone: +34 96 124 66 61, Fax: + 34 96 124 57 46

Email address: m.consuelo.chafer@uv.es

Ana.garcia-blanco@uv.es

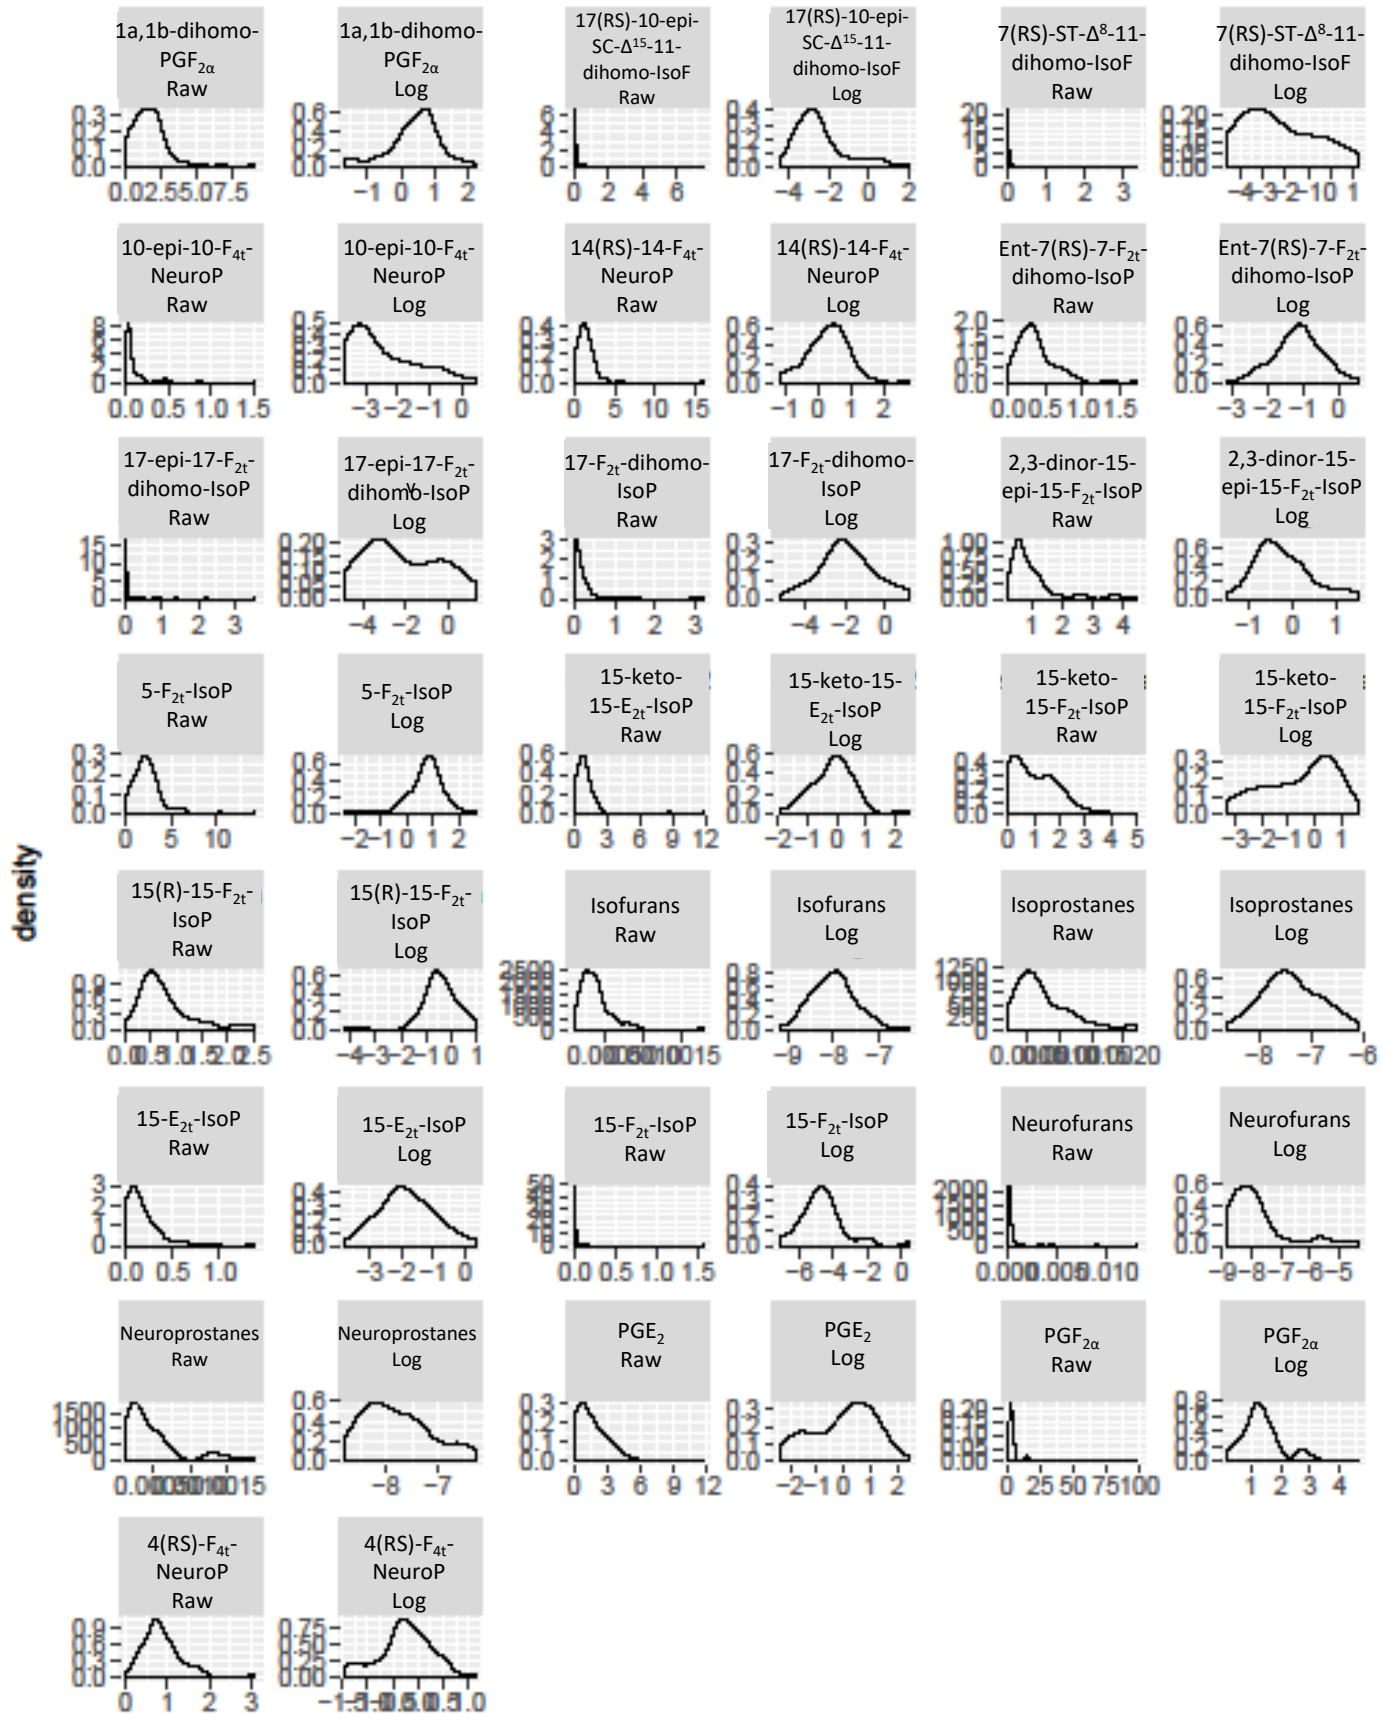

Supplementary Material

Figure S1. Distribution of the log-transformed data for all the variables.
